1 **Visualization of axonal protein allocation in *Drosophila* with whole-brain**  
2 **localization microscopy**

3 **Authors:** Li-An Chu<sup>1,2,#</sup>, Chieh-Han Lu<sup>2,4,#,†</sup>, Shun-Min Yang<sup>2</sup>, Kuan-Lin Feng<sup>3</sup>, Yen-Ting  
4 Liu<sup>4</sup>, Chun-Chao Chen<sup>1</sup>, Yun-Chi Tsai<sup>4</sup>, Peilin Chen<sup>4</sup>, Ting-Kuo Lee<sup>2</sup>, Yeu-Kuang Hwu<sup>2</sup>, Bi-  
5 Chang Chen<sup>4\*</sup>, Ann-Shyn Chiang<sup>1,2,3,5,6,7\*</sup>

6 **Affiliations:**

- 7 1. Brain Research Center, National Tsing Hua University, Hsinchu 30013, Taiwan  
8 2. Institute of Physics, Academia Sinica, Taipei 11529, Taiwan  
9 3. Institute of Systems Neuroscience, National Tsing Hua University, Hsinchu 30013,  
10 Taiwan  
11 4. Research Center for Applied Sciences, Academia Sinica, Taipei 11529, Taiwan  
12 5. Department of Biomedical Science and Environmental Biology, Kaohsiung Medical  
13 University, Kaohsiung 80780, Taiwan  
14 6. Institute of Molecular and Genomic Medicine, National Health Research Institutes,  
15 Zhunan, Miaoli 35053, Taiwan  
16 7. Kavli Institute for Brain and Mind, University of California at San Diego, La Jolla, CA  
17 92093-0526, USA

18 #These authors contributed equally to the project.

19 † Present address: Department of Genetics and Complex Diseases, Harvard T H Chan School  
20 of Public Health, Boston, MA02115, United States

21 \*Correspondence and requests for materials should be addressed to A.S.C. or B.C.C

22 Ann-Shyn Chiang, Brain Research Center, National Tsing Hua University,  
23 101, Section 2, Kuang-Fu Road, Hsinchu 30013, Taiwan  
24 Phone: 886-3-5742760; FAX: 886-3-5715934

1 Bi-Chang Chen, Research Center for Applied Sciences, Academia Sinica,

2 128 Sec. 2, Academia Rd., Nankang, Taipei 11529, Taiwan

3 Phone: 886-2-27873133; FAX: 886-2-27873122

4

1 **Abstract**

2 Long-term memory (LTM) formation requires learning-induced protein synthesis in  
3 specific neurons and synapses within a neural circuit. Precisely how neural activity  
4 allocates new proteins to specific synaptic ensembles, however, remains unknown. We  
5 developed a deep-tissue super-resolution imaging tool suitable for single-molecule  
6 localization in intact adult *Drosophila* brain, and focused on the axonal protein allocation  
7 in mushroom body (MB), a central neuronal structure involved in olfactory memory  
8 formation. We found that insufficient training suppresses LTM formation by inducing the  
9 synthesis of vesicular monoamine transporter (VMAT) proteins within a dorsal paired  
10 medial (DPM) neuron, which innervates all axonal lobes of the MB. Surprisingly, using  
11 our localization microscopy, we found that these learning-induced proteins are distributed  
12 only in a subset of DPM axons in specific sectors along the MB lobes. This neural  
13 architecture suggests that sector-specific modulation of neural activity from MB neurons  
14 gates consolidation of early transient memory into LTM.

15

## 1 **Introduction**

2 Memory formation requires learning-induced protein synthesis in specific neurons and  
3 synapses within a neural circuit. In all species examined, there are two distinct phases of  
4 memory formation: a transient neural activity associated with early memory and a protein-  
5 synthesis-dependent change in synaptic connectivity associated with long-term memory  
6 (LTM)<sup>1,2</sup>. Early memory is labile; sustained neural activity during this phase nonetheless is  
7 crucial for the induction of LTM and its underlying protein synthesis, which occurs only in a  
8 few neurons sparsely distributed throughout the brain<sup>3-5</sup>. Exactly how neural activity induces  
9 protein synthesis in some but not all neurons in a circuit and then allocates new proteins to  
10 specific synaptic ensembles during LTM formation, however, remains unknown.

11 Recent advances in super-resolution microscopy have allowed for localization of single  
12 molecules within individual cells<sup>6-8</sup>, but not within large tissues<sup>9</sup>. Our understanding of  
13 memory formation may benefit from these advances by enabling us to visualize the allocation  
14 of associative learning-induced proteins at the level of the synapse. In the present study, we  
15 integrated several optical technologies to develop a deep-tissue imaging tool suitable for  
16 single-molecule localization in an intact adult *Drosophila* brain. We show that insufficient  
17 training suppresses LTM formation by inducing the synthesis of vesicular monoamine  
18 transporter (VMAT) proteins in a single dorsal paired medial (DPM) neuron, which  
19 innervates all axonal lobes of the mushroom body (MB). Consistent with this observation,  
20 downregulation of VMAT or reduced serotonin synthesis in the DPM neuron enhances LTM  
21 formation. Strikingly, we found that training-induced VMAT proteins are preferentially  
22 allocated to a specific subset of DPM neurites, which arborize within the  $\alpha 2/\beta'1$  MB sectors.  
23 This neural architecture suggests that sector-specific serotonin modulation of neural activity  
24 from MB neurons gates consolidation of early transient memory into LTM. Moreover, the

1 present study demonstrates that our single-molecule imaging technique can be used to  
2 visualize memory allocation at specific synaptic ensembles within an intact brain.

### 3 **Results**

#### 4 **Deep-tissue localization microscopy (DTLM)**

5 The study of memory formation requires novel tools for visualizing the allocation of  
6 learning-induced proteins into synaptic ensembles in an intact brain. Several research groups  
7 have attempted to modify super-resolution microscopy techniques for use with larger imaging  
8 volumes<sup>10-13</sup>. Among these techniques, point accumulation for imaging in nanoscale  
9 topography has achieved sub-100 nm resolution in samples over 20- $\mu$ m thick by utilizing the  
10 inherent optical sectioning of the lattice lightsheet to prevent premature photo-bleaching  
11 (which limits localization and image quality)<sup>13,14</sup>. This method nonetheless fails to  
12 compensate for tissue-induced aberrations, thereby restricting imaging depth and volume. To  
13 visualize protein molecules within larger tissues, we integrated a Bessel beam lightsheet,  
14 spontaneous blinking fluorophore, and optical tissue clearing to develop a deep-tissue  
15 imaging tool suitable for single-molecule localization in an intact adult *Drosophila* brain (**Fig.**  
16 **1a and Methods**). The lightsheet was generated by scanning a Bessel beam created by  
17 filtering the laser illumination with an annular ring mask at the Fourier plane, which was  
18 conjugated to the back aperture of the excitation objective (customized, N.A. = 0.5, working  
19 distance = 12.8 mm; NARLabs, ITRC, Taiwan; **Fig. 1b**)<sup>15,16</sup>. The Bessel beam has been  
20 described as a self-reconstruction light beam that is particularly effective for penetrating into  
21 a thick specimen<sup>15,16</sup>. The length of this lightsheet was extended from 50  $\mu$ m to over 200  $\mu$ m  
22 using an axicon lens (**Supplementary Fig. 1a,b**). Through constructive interference at the  
23 imaging plane, the energy distribution of the lightsheet is spatially confined within a 0.5- $\mu$ m  
24 layer, thereby reducing background signal and preventing unwanted photo-bleaching

1 **(Supplementary Fig. 1c,d).**

2 Traditional localization microscopy relies on two chemical mechanisms for the partial  
3 activation of fluorophores: either an alternating two-wavelength exposure or a single-  
4 wavelength high-intensity illumination<sup>7,8,17</sup>. Use of an additional activation laser, however,  
5 prolongs image acquisition time and causes additional photo-bleaching due to short-  
6 wavelength exposure. For high intensity illumination, the laser fluence deposited to the  
7 sample rapidly consumes the photon budget and makes it unrealistic to achieve large scale  
8 imaging. We addressed these problems by using a novel spontaneous blinking fluorophore,  
9 HMSiR, which can be excited at a relatively low power density of 40 W/cm<sup>2</sup>. Consequently  
10 fluorophore blinking was extended to an area up to 75,000 μm<sup>2</sup> (**Fig. 1b**). When combined  
11 with the use of HMSiR and tissue clearing (ScaleView-A2)<sup>18</sup>, our DTLM method can  
12 reconstruct super-resolution images of an entire adult brain (**Methods**). Importantly, the  
13 uncertainty of localized blinking events is similar through the entire z depth (**Fig. 1c**).  
14 Typically, over 100 M particles are contained in each of the four sub-volumes used to  
15 reconstruct DTLM images of the whole brain (**Supplementary Fig. 1e**), and the total  
16 acquisition time is less than one day (**Methods**). To analyze gigantic datasets of raw images  
17 and reconstruct the whole fly brain at super-resolution, we created a parallel computing  
18 pipeline based on ThunderSTORM<sup>19</sup> on a Lustre-backed Torque cluster (**Supplementary**  
19 **Movie 1, Supplementary Fig. 2**).

20 The photoelectric sensors used for conventional fluorescence imaging (green fluorescent  
21 protein, GFP) have a limited dynamic range. Thus, it can be difficult to capture structures  
22 with weaker GFP signals in a single image (**Supplementary Fig. 5b, left**). Because DTLM  
23 localizes individual molecules separately and reconstructs the image based on localization  
24 events, it is insensitive to intensity differences, thereby enabling the capture of greater detail  
25 in a single image. DTLM, for instance, captured a majority of parallel, densely bundled

1 neural fibers connecting the brain and body (**Supplementary Fig. 5b, middle**). When  
2 sufficient localization density was achieved, individual brain-ascending/descending fibers  
3 could be digitally segmented (**Supplementary Fig. 5b, right**). Furthermore, DTLM enabled  
4 three-dimensional visualization of individual synaptic proteins (Down syndrome cell  
5 adhesion molecules) within a single spine-like protrusion in a dendrite of the giant fiber  
6 neuron (**Supplementary Fig. 5c**).

### 7 **Visualizing fine neurites in the whole brain**

8 Targeted genetic manipulations using the promoter-driven *TH-Gal4* line<sup>20</sup> have revealed that  
9 dopaminergic neurons (DANs) are involved in various brain functions in *Drosophila*,  
10 including decision making<sup>21</sup>, arousal<sup>22</sup>, and learning and memory<sup>23</sup>. To obtain a more  
11 comprehensive understanding of these neural circuits underlying various behaviors, we used  
12 single-molecule DTLM imaging to map the morphology and wiring patterns of all *TH-Gal4*  
13 neurons in the adult brain (**Fig. 2**). Due to nominal photo-bleaching and optical clearing,  
14 DTLM allowed us to image several overlapped sub-volumes under a high N.A. lens and  
15 stitch them into a single big dataset of the entire brain at super-resolution. This large-volume  
16 super-resolution map enabled simultaneous visualization of putative dopaminergic neurons  
17 labelled with strong GFP signal in the central brain (**Supplementary Fig. 6**), as well as fine  
18 neurites labelled with weak GFP signal in the optic lobe (**Fig. 2a**). Serial optical slices and  
19 three-dimensional navigation demonstrated extensive yet separable neurites (**Supplementary**  
20 **Movie 3**). These high-quality images also allowed for digital segmentation of most individual  
21 neurons, with nominal axial overlap (**Fig. 2b**). Next, we applied DTLM to visualize the  
22 allocation of learning-induced new proteins.

### 23 **Suppression of LTM formation due to insufficient training**

1 *Drosophila* can learn to associate an odor with foot-shock punishment, and memory  
2 formation thereafter exhibits several temporal phases, including protein synthesis-dependent  
3 long-term memory<sup>24,25</sup>. The odor-shock association appears to occur in the MB, where the  
4 conditioned odor stimulus is represented by the neural activity of a sparse subpopulation of  
5 intrinsic Kenyon cells (KCs). The MB lobes can be subdivided into 15 consecutive sectors  
6 based on their innervation by distinct types of DANs and MB output neurons (MBONs).  
7 Evidence suggests that the unconditioned aversive stimulus is relayed via three types of  
8 dopaminergic neurons innervating the  $\alpha'1\gamma2$ ,  $\beta2\beta'2$ , and  $\gamma1$  sectors, respectively, thereby  
9 modulating synaptic strength between KCs and MBONs and leading to conditioned  
10 behaviours<sup>4,5,26-29</sup>. Multiple sessions of training with regular rest intervals (i.e., spaced  
11 training) induce a transient increase in KC-MBON responses that eventually transforms into  
12 stable LTM—a process that involves local protein synthesis in three types of MBONs  
13 innervating the  $\alpha3/\beta'1/\beta'2/\gamma3$  sectors, respectively<sup>4,5</sup>. It remains unclear how this sector-  
14 specific modulation occurs and leads to LTM storage in specific neurons and synapses  
15 downstream of the MB.

16 The dorsal paired medial (DPM) neuron, on the other hand, is a single giant neuron with  
17 extensive neurites that innervate all MB lobes, modulating KC-MBON activity by releasing  
18 serotonin to sustain neural activity associated with an intermediate phase of anesthesia-  
19 resistant memory (ARM)<sup>27</sup>. In aged flies, reduced DPM-MBON connectivity appears to  
20 impair protein synthesis-dependent LTM<sup>28</sup>. Thus, ARM and LTM may be mutually  
21 exclusive<sup>28</sup>. To address how DPM participates in memory formation, we first trained flies  
22 with DPM serotonin levels reduced by adult-stage specific RNAi-mediated downregulation  
23 of synthetic enzymes. Normally, flies form maximal 1-day memory after 10 sessions of  
24 spaced training (10x spaced) but minimal memory after only three sessions of spaced training  
25 (3x spaced). When serotonin signaling in the DPM neuron was reduced, 3x spaced training



1 now was sufficient to produce maximal 1-day memory (**Fig. 3a**). This enhanced LTM lasted  
2 for at least 4 days and was not seen after 3x massed training (**Fig. 3a**), suggesting a bona-fide  
3 protein-synthesis dependent LTM (and not ARM). With immunolabeling, we also observed a  
4 significant increase in vesicular monoamine transporter (VMAT) proteins—which uptake  
5 serotonin and other monoamines into presynaptic vesicles—at the DPM soma within 3 hours  
6 after 3x spaced training (**Fig. 3b**). This increase in VMAT expression was abolished by acute  
7 activation of temperature-sensitive RICIN<sup>cs</sup>, a ribosomal toxin that inhibits protein  
8 synthesis<sup>3,30,31</sup>. RNAi-mediated downregulation of VMAT yielded a decrease in anti-VMAT  
9 intensity in the DPM soma (**Fig. 3c**) and also enhanced 1-day memory after 3x spaced  
10 training (**Fig. 3d**). Together, these results suggest that insufficient spaced training suppresses  
11 LTM formation by inducing VMAT synthesis and increasing serotonergic signaling from  
12 DPM neurons.

### 13 **Visualizing synaptic VMAT molecules in DPM neurites**

14 To further examine how insufficient training-induced VMAT proteins regulate serotonin  
15 release from DPM neurons in synapses, we used single-molecule DTLM imaging to quantify  
16 changes in VMAT distribution among all DPM neurites before and after 3x spaced training  
17 (**Fig. 4a**). By cropping the MB boundary, we determined the total number of immunolabeled  
18 VMAT molecules in the MB. We classified these VMAT molecules into DPM+ and DPM-  
19 groups based on the 3D digital intersection between VMAT and DPM (**Supplementary**  
20 **Movie 4**). Importantly, this classification can be achieved only by using DTLM  
21 (**Supplementary Fig. 7a**) and cannot be achieved with state-of-the-art confocal microscopy  
22 (**Supplementary Fig. 7b**). The precision of DPM+ VMAT localization was demonstrated by  
23 targeted *VMAT*<sup>RNAi</sup> expression, which reduced the total number of VMAT molecules in  
24 DPM+ neurites but not in the DPM- regions of MB lobes (**Fig. 4b, Supplementary Fig. 7c**).  
25 Next, we examined VMAT molecules throughout the DPM neurites before and 3 hours after

1 3x spaced training and found that their distributions are highly variable among different flies,  
2 with a tendency to increase after training (**Supplementary Fig. 7d**). Unexpectedly, this  
3 tendency was statistically insignificant (**Fig. 4b**), regardless of the increase in the soma (**Fig.**  
4 **3b**). Connectomic electron microscopy (EM) tracing of the  $\alpha 1/\alpha 2/\alpha 3$  MB sectors indicates  
5 that the DPM neuron synapses with DANs/KCs/MBONs to form intricate sector-specific  
6 networks<sup>32,33</sup>. These DPM neurites exhibit branch-specific neural activity (memory traces)  
7 after associative learning<sup>34</sup>, prompting us to investigate whether 3x spaced training induced  
8 VMAT expression in some but not all sectors of DPM neurites.

### 9 **MB sector-specific increases in DPM VMAT molecules induced by space training**

10 We manually segmented DPM neurites into 15 MB sectors based on methods utilized in a  
11 previous study<sup>35</sup> (**Supplementary Fig. 8 and Methods**). Quantitative analysis revealed that  
12 the density of VMAT molecules in DPM+ neurites increased after training in the  $\alpha 2$  and  $\beta' 1$   
13 sectors but not in the remaining MB sectors or in DPM- regions, when compared to that in  
14 naïve flies (**Fig. 4c, d**). These increases appeared to be evenly distributed in the affected  
15 sectors. In naive flies that had not undergone training, the distribution of VMAT molecules  
16 was highly variable between DPM+ and DPM- neurites and among different sectors (**Fig. 4c**).

### 17 **Discussion**

18 Spatiotemporal allocation of associative learning-induced VMAT molecules suggests that  
19 DPM neurons regulate memory formation via serotonergic modulation of DAN/KC/MBON  
20 circuits in specific MB sectors. Translational regulation may account for this sector-specific  
21 allocation, as increases in VMAT are (i) regulated by Fragile X mental retardation protein,  
22 which itself is involved in olfactory LTM formation<sup>36,37</sup> and (ii) blocked by inhibition of  
23 protein synthesis (**Fig. 3d**). Transcriptional regulation may also be implicated, as increases in  
24 VMAT expression after training occur in both the soma and neurites of DPM neurons (**Figs.**

1 **3 and 4**). Previous studies have suggested that training induces local protein synthesis in  
2  $\alpha 3/\beta'1/\beta'2/\gamma 3$  MBONs during LTM consolidation<sup>4,5</sup>. The findings of the present study  
3 suggest that modulation of serotonergic signaling (via VMAT) from DPM neurons to sector-  
4 specific MB neurons also contributes to LTM consolidation during the first few hours after  
5 training (**Fig. 3d**) but not during LTM retrieval<sup>38</sup>. Further studies are required to determine  
6 whether  $\alpha 2/\beta'1$ -VMATs in the DPM directly and specifically modulate the function of  
7  $\alpha 2/\beta'1$  MBONs. Although  $\alpha 2$  MBONs exhibit highly variable functional responses among  
8 individual subjects<sup>39</sup>, their outputs appear necessary during LTM retrieval<sup>39</sup>. In contrast,  $\beta'1$   
9 MBONs appear to be involved in the forgetting process<sup>40</sup>.

10 Neural plasticity involves local protein synthesis in both presynaptic axon terminals and  
11 postsynaptic dendrite spines<sup>41</sup>. In *Drosophila* olfactory memory formation, postsynaptic  
12 regulation of protein synthesis has been demonstrated<sup>4,5</sup>, and here we present data suggesting  
13 presynaptic regulation of protein synthesis during memory formation, as well. Using deep-  
14 tissue localization microscopy, we further extend the visualization of protein allocations in a  
15 few target neurons to a systems level of analysis. Consistent with branch-specific functional  
16 responses during associative learning<sup>34</sup>, our finding of sector-specific allocation of  
17 presynaptic VMAT proteins in DPM neurons adds another layer of coding complexity to the  
18 DANs/KCs/MBONs circuit within the MB. Spatiotemporal VMAT-mediated serotonin  
19 release from DPM axons then directly modulates the neural activity of a subset of KCs within  
20 specific MB sectors. Such serotonergic signaling helps to translate transient neural activity in  
21 the MB circuit during early memory into LTM that includes postsynaptic regulation of  
22 protein synthesis in specific MBONs.

23 One limitation of our current imaging method is that the precision of axial localization is  
24 restricted by the thickness of the Bessel lightsheet (~500 nm), which is much less than the  
25 precision at the lateral plane (~30 nm). Thus, separating entangled neurites is trivial at X-Y

1 plane but not always reliable along the Z axis. In this study, we corrected for this Z-plane  
2 limitation by classifying VMAT immune-positive signals into DPM+ versus DPM- groups.  
3 This approach was reasonably reliable because all imaged neurites in the MB derived from a  
4 single DPM neuron. In future studies, the Z-axis resolution may be improved further (i) by  
5 optical clearing using a medium with a higher refractive index<sup>42</sup> matched with a higher-  
6 aperture objective, (ii) by using a cylindrical lens to refine the Z position<sup>43</sup>, and/or (iii) by  
7 combining DTLM with expansion microscopy<sup>44</sup>. With imaging near isotropic super-  
8 resolution, visualization of the connectome representing LTM-dependent neuroplasticity  
9 among all synaptic connections in an intact fly brain soon will be achievable<sup>3-5</sup>.

10

## 11 **References**

- 12 1 Kandel, E. R., Dudai, Y. & Mayford, M. R. The molecular and systems biology of  
13 memory. *Cell* **157**, 163-186 (2014).
- 14 2 Tonegawa, S., Pignatelli, M., Roy, D. S. & Ryan, T. J. Memory engram storage and  
15 retrieval. *Curr Opin Neurobiol* **35**, 101-109 (2015).
- 16 3 Chen, C. C. *et al.* Visualizing long-term memory formation in two neurons of the  
17 *Drosophila* brain. *Science* **335**, 678-685 (2012).
- 18 4 Pai, T. P. *et al.* *Drosophila* ORB protein in two mushroom body output neurons is  
19 necessary for long-term memory formation. *Proc Natl Acad Sci U S A* **110**, 7898-7903  
20 (2013).
- 21 5 Wu, J. K. *et al.* Long-term memory requires sequential protein synthesis in three subsets  
22 of mushroom body output neurons in *Drosophila*. *Sci Rep* **7**, 7112, doi:10.1038/s41598-  
23 017-07600-2 (2017).

- 1 6 Hell, S. W. & Wichmann, J. Breaking the diffraction resolution limit by stimulated  
2 emission: stimulated-emission-depletion fluorescence microscopy. *Opt Lett* **19**, 780-782  
3 (1994).
- 4 7 Rust, M. J., Bates, M. & Zhuang, X. Sub-diffraction-limit imaging by stochastic optical  
5 reconstruction microscopy (STORM). *Nat Methods* **3**, 793-795 (2006).
- 6 8 Betzig, E. *et al.* Imaging intracellular fluorescent proteins at nanometer resolution.  
7 *Science* **313**, 1642-1645 (2006).
- 8 9 Spuhler, I. A., Conley, G. M., Scheffold, F. & Sprecher, S. G. Super resolution imaging  
9 of genetically labeled synapses in *Drosophila* brain tissue. *Front Cell Neurosci* **142**, 1-10  
10 (2016).
- 11 10 Vaziri, A., Tang, J., Shroff, H. & Shank, C. V. Multilayer three-dimensional super  
12 resolution imaging of thick biological samples. *Proc Natl Acad Sci U S A* **105**, 20221-  
13 20226 (2008).
- 14 11 Abrahamsson, S. *et al.* Fast multicolor 3D imaging using aberration-corrected multifocus  
15 microscopy. *Nat Methods* **10**, 60-63 (2013).
- 16 12 Cella Zanacchi, F. *et al.* Live-cell 3D super-resolution imaging in thick biological  
17 samples. *Nat Methods* **8**, 1047-1049 (2011).
- 18 13 Legant, W. R. *et al.* High-density three-dimensional localization microscopy across large  
19 volumes. *Nat Methods* **13**, 359-365 (2016).
- 20 14 Schueder, F. *et al.* Multiplexed 3D super-resolution imaging of whole cells using  
21 spinning disk confocal microscopy and DNA-PAINT. *Nat Commun* **8**, 2090 (2017).
- 22 15 Fahrbach, F. O. & Rohrbach, A. Propagation stability of self-reconstructing Bessel  
23 beams enables contrast-enhanced imaging in thick media. *Nat Commun* **3**, 632 (2012).

- 1 16 Gao, L., Shao, L., Chen, B. C. & Betzig, E. 3D live fluorescence imaging of cellular  
2 dynamics using Bessel beam plane illumination microscopy. *Nat Protoc* **9**, 1083-1101  
3 (2014).
- 4 17 Heilemann, M. *et al.* Subdiffraction-resolution fluorescence imaging with conventional  
5 fluorescent probes. *Angew Chem Int Ed Engl* **47**, 6172-6176 (2008).
- 6 18 Hama, H. *et al.* Scale: a chemical approach for fluorescence imaging and reconstruction  
7 of transparent mouse brain. *Nat Neurosci* **14**, 1481-1488, (2011)
- 8 19 Ovesny, M., Krizek, P., Borkovec, J., Svindrych, Z. & Hagen, G. M. ThunderSTORM: a  
9 comprehensive ImageJ plug-in for PALM and STORM data analysis and super-  
10 resolution imaging. *Bioinformatics* **30**, 2389-2390 (2014).
- 11 20 Friggi-Grelin, F. *et al.* Targeted gene expression in *Drosophila* dopaminergic cells using  
12 regulatory sequences from tyrosine hydroxylase. *J Neurobiol* **54**, 618-627 (2003).
- 13 21 Zhang, K., Guo, J. Z., Peng, Y., Xi, W. & Guo, A. Dopamine-mushroom body circuit  
14 regulates saliency-based decision-making in *Drosophila*. *Science* **316**, 1901-1904 (2007).
- 15 22 Andretic, R., van Swinderen, B. & Greenspan, R. J. Dopaminergic modulation of arousal  
16 in *Drosophila*. *Curr Biol* **15**, 1165-1175 (2005).
- 17 23 Waddell, S. Reinforcement signalling in *Drosophila*; dopamine does it all after all. *Curr*  
18 *Opin Neurobiol* **23**, 324-329 (2013).
- 19 24 Dubnau, J. & Chiang, A. S. Systems memory consolidation in *Drosophila*. *Curr Opin*  
20 *Neurobiol* **23**, 84-91 (2013).
- 21 25 Cognigni, P., Felsenberg, J. & Waddell, S. Do the right thing: neural network  
22 mechanisms of memory formation, expression and update in *Drosophila*. *Curr Opin*  
23 *Neurobiol* **49**, 51-58 (2018).
- 24 26 Aso, Y. *et al.* Three dopamine pathways induce aversive odor memories with different  
25 stability. *PLoS Genet* **8**, e1002768 (2012).

- 1 27 Lee, P. T. *et al.* Serotonin-mushroom body circuit modulating the formation of  
2 anesthesia-resistant memory in *Drosophila*. *Proc Natl Acad Sci U S A* **108**, 13794-13799  
3 (2011).
- 4 28 Isabel, G., Pascual, A. & Preat, T. Exclusive consolidated memory phases in *Drosophila*.  
5 *Science* **304**, 1024-1027 (2004).
- 6 29 Tonoki, A. & Davis, R. L. Aging impairs protein-synthesis-dependent long-term memory  
7 in *Drosophila*. *J Neurosci* **35**, 1173-1180 (2015).
- 8 30 Endo, Y., Mitsui, K., Motizuki, M. & Tsurugi, K. The mechanism of action of ricin and  
9 related toxic lectins on eukaryotic ribosomes. The site and the characteristics of the  
10 modification in 28 S ribosomal RNA caused by the toxins. *J Biol Chem* **262**, 5908-5912  
11 (1987).
- 12 31 Endo, Y. & Tsurugi, K. RNA N-glycosidase activity of ricin A-chain. Mechanism of  
13 action of the toxic lectin ricin on eukaryotic ribosomes. *J Biol Chem* **262**, 8128-8130  
14 (1987).
- 15 32 Aso, Y. & Rubin, G. M. Dopaminergic neurons write and update memories with cell-  
16 type-specific rules. *Elife* **5** (2016).
- 17 33 Takemura, S. Y. *et al.* A connectome of a learning and memory center in the adult  
18 *Drosophila* brain. *Elife* **6** (2017).
- 19 34 Yu, D., Keene, A. C., Srivatsan, A., Waddell, S. & Davis, R. L. *Drosophila* DPM  
20 neurons form a delayed and branch-specific memory trace after olfactory classical  
21 conditioning. *Cell* **123**, 945-957 (2005).
- 22 35 Aso, Y. *et al.* The neuronal architecture of the mushroom body provides a logic for  
23 associative learning. *Elife* **3** (2014).

- 1 36 Tauber, J. M., Vanlandingham, P. A. & Zhang, B. Elevated levels of the vesicular  
2 monoamine transporter and a novel repetitive behavior in the *Drosophila* model of  
3 fragile X syndrome. *PLoS One* **6**, e27100 (2011).
- 4 37 Bolduc, F. V., Bell, K., Cox, H., Broadie, K. S. & Tully, T. Excess protein synthesis in  
5 *Drosophila* fragile X mutants impairs long-term memory. *Nat Neurosci* **11**, 1143-1145  
6 (2008).
- 7 38 Keene, A. C., Krashes, M. J., Leung, B., Bernard, J. A. & Waddell, S. *Drosophila* dorsal  
8 paired medial neurons provide a general mechanism for memory consolidation. *Curr*  
9 *Biol* **16**, 1524-1530 (2006).
- 10 39 Hige, T., Aso, Y., Rubin, G. M. & Turner, G. C. Plasticity-driven individualization of  
11 olfactory coding in mushroom body output neurons. *Nature* **526**, 258-262 (2015).
- 12 40 Shuai, Y. *et al.* Dissecting neural pathways for forgetting in *Drosophila* olfactory  
13 aversive memory. *Proc Natl Acad Sci U S A* **112**, E6663-6672 (2015).
- 14 41 Younts, T. J. *et al.* Presynaptic protein synthesis is required for long-term plasticity of  
15 GABA release. *Neuron* **92**, 479-492 (2016).
- 16 42 Long, X., Colonell, J., Wong, A. M., Singer, R. H. & Lionnet, T. Quantitative mRNA  
17 imaging throughout the entire *Drosophila* brain. *Nat Methods* **14**, 703-706 (2017).
- 18 43 Huang, B., Wang, W., Bates, M. & Zhuang, X. Three-dimensional super-resolution  
19 imaging by stochastic optical reconstruction microscopy. *Science* **319**, 810-813 (2008).
- 20 44 Chen, F., Tillberg, P. W. & Boyden, E. S. Optical imaging. Expansion microscopy.  
21 *Science* **347**, 543-548 (2015).

22



## 1 **Acknowledgments**

2 We are grateful to Tim Tully for critical comments and editing on the manuscript. The  
3 control software of the microscope is licensed by Howard Hughes Medical Institute, Janelia  
4 Farm Research Campus. We thank David Krantz for sharing the rabbit-anti VMAT antibody.  
5 We thank Vienna *Drosophila* Resource Center, *Drosophila* Genetic Resource Consortium  
6 and Bloomington Stock Center for fly stocks. This work was supported by grants from the  
7 Ministry of Science and Technology and Ministry of Education of Taiwan for L.A.C (MOST  
8 106-2321-B-007-008-MY3), A.S.C. (Higher-Education Deep Cultivation Program) and  
9 B.C.C. (MOST 107-3017-F-007-004, MOST 103-2113-M-001-003-MY2), and from the  
10 Academia Sinica for B.C.C. (Career Development Award).

11 **Author contributions:** L.A.C. and C.H.L. planned and performed the imaging experiments  
12 and image processing. L.A.C. performed immunostaining experiments. C.H.L, Y.T.L, and  
13 B.C.C. designed and constructed the DTLM. S.M.Y. produced the HMSiR conjugates. K.L.F.  
14 and C.C.C. planned and performed the behavioral experiments. Y.T.L. designed the  
15 automated blinking image processing protocol and software. L.A.C. performed image  
16 analysis. L.A.C., C.H.L., B.C.C. and A.S.C. wrote the manuscript. B.C.C and A.S.C. planned  
17 and managed the project.

18 **Competing interests:** The authors declare no competing financial interests. Readers are  
19 welcome to comment on the online version of the paper.

20 **Data and materials availability:** Requests for materials should be addressed to B.C.C.  
21 (chenb10@gate.sinica.edu.tw) or A.S.C. ([aschinag@life.nthu.edu.tw](mailto:aschinag@life.nthu.edu.tw)).

22

## 1 Figures and figure legends

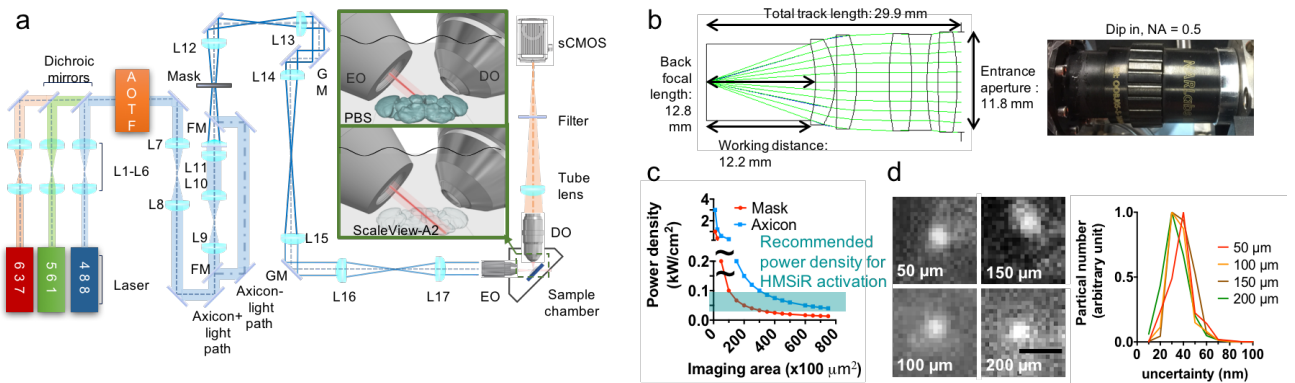

2

3 **Fig. 1. Bessel beam lightsheet for deep-tissue localization microscopy (DTLM).** (a) The

4 schematic configuration of the DTLM system. Inset: the geometry of relative positions

5 between two objective lenses and the specimen. AOTF: acoustic-optical tuneable filter; EO,

6 excitation objective; DO, detection objective; GM: galvo mirror; L: lens. (b) A customized

7 dip-in objective lens matching refractive index of ScaleView-A2 at a long working distance

8 of 12.2 mm. Left, Photograph of the lens. Right, Schematic design and simulated ray tracing.

9 (c) The lightsheet generated using an axicon lens carries higher power density than that

10 generated using the mask only. At the power density ( $40 \text{ w/cm}^2$ ) for HMSiR excitation, the

11 maximum lightsheet areas are  $25,000 \mu\text{m}^2$  and  $75,000 \mu\text{m}^2$ , generated using a mask only and

12 an axicon lens, respectively. (d) Representative HMSiR blinking events (left) and overall

13 lateral uncertainty distribution (right) at four different depths in the fly brain cleared with

14 ScaleView-A2. Scale bar =  $1 \mu\text{m}$ .

15

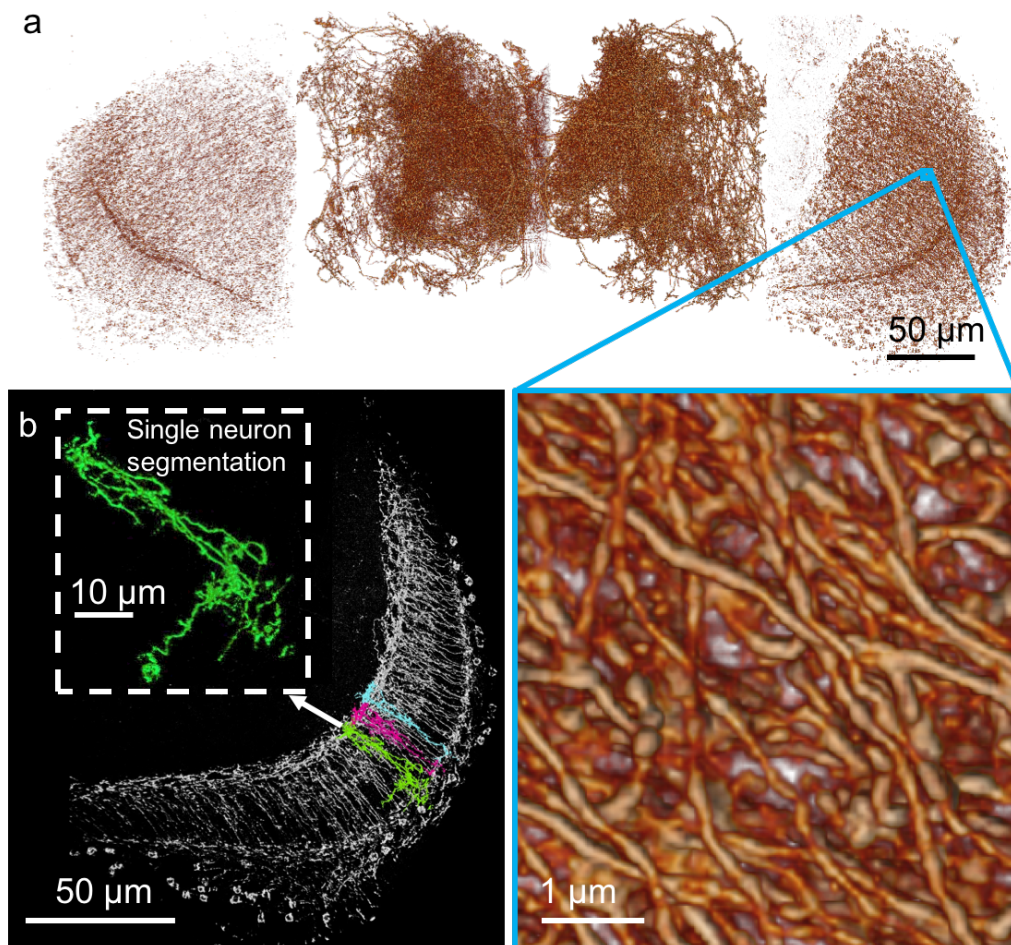

1

2 **Fig. 2. Single-molecule deep-tissue localization microscopy (DTLM) imaging of**  
3 **dopaminergic neurons (DANs) in the whole *Drosophila* brain. (a) Volume rendering of**  
4 **whole-brain DANs. Zoom-in images show distinguishable interweaved neurites. (b) Digital**  
5 **segmentation of local neurons in the medulla. Inset: enlarged green neuron. The**  
6 **experimental flies carried *TH-Gal4; UAS-GCaMP6f* transgenes.**

7

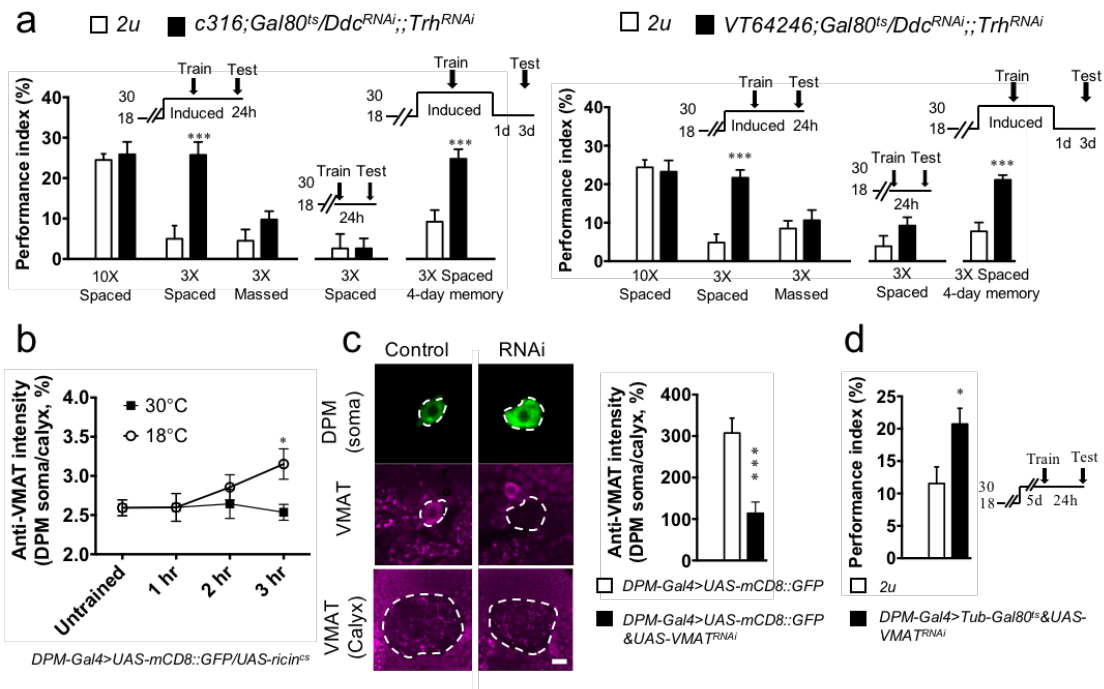

1

2 **Fig. 3. Serotonin released from dorsal paired medial (DPM) neurons suppresses long-**

3 **term memory (LTM) formation. (a) Effects of adult-stage specific down-regulation of**

4 **serotonin synthesis enzymes (*Ddc*<sup>RNAi</sup> and *Trh*<sup>RNAi</sup>) with two independent *DPM-Gal4* drivers**

5 **(*c316* and *VT64246*) on 1-day and 4-day memory retention after various training protocols.**

6 **(b) Changes in VMAT signals in the DPM soma within 3 hours after training. Protein**

7 **synthesis was blocked by the active ribosomal toxin RICIN<sup>CS</sup> at 30°C but unaffected by the**

8 **inactive RICIN<sup>CS</sup> at 18°C. (c) Effectiveness and specificity. Left, *VMAT*<sup>RNAi</sup> (vesicular**

9 **monoamine transporter) effectively downregulates anti-VMAT immuno-positive signals**

10 **(magenta) in the DPM cell body (green) but not in the mushroom body (MB) calyx, which is**

11 **not innervated by the DPM neuron. Right, Quantitative measurements. (d) Adult-stage**

12 **specific RNAi-mediated downregulation of VMAT in the DPM neuron enhanced 1-day**

13 **memory (*DPM-Gal4: VT64246-Gal4*) (see **Methods** for training protocols). Each value**

14 **represents the mean  $\pm$  S.E.M. (n = 8 in **A, B, D**, n = 10 in **C**). \*, P < 0.05; \*\*\*, P < 0.001.**

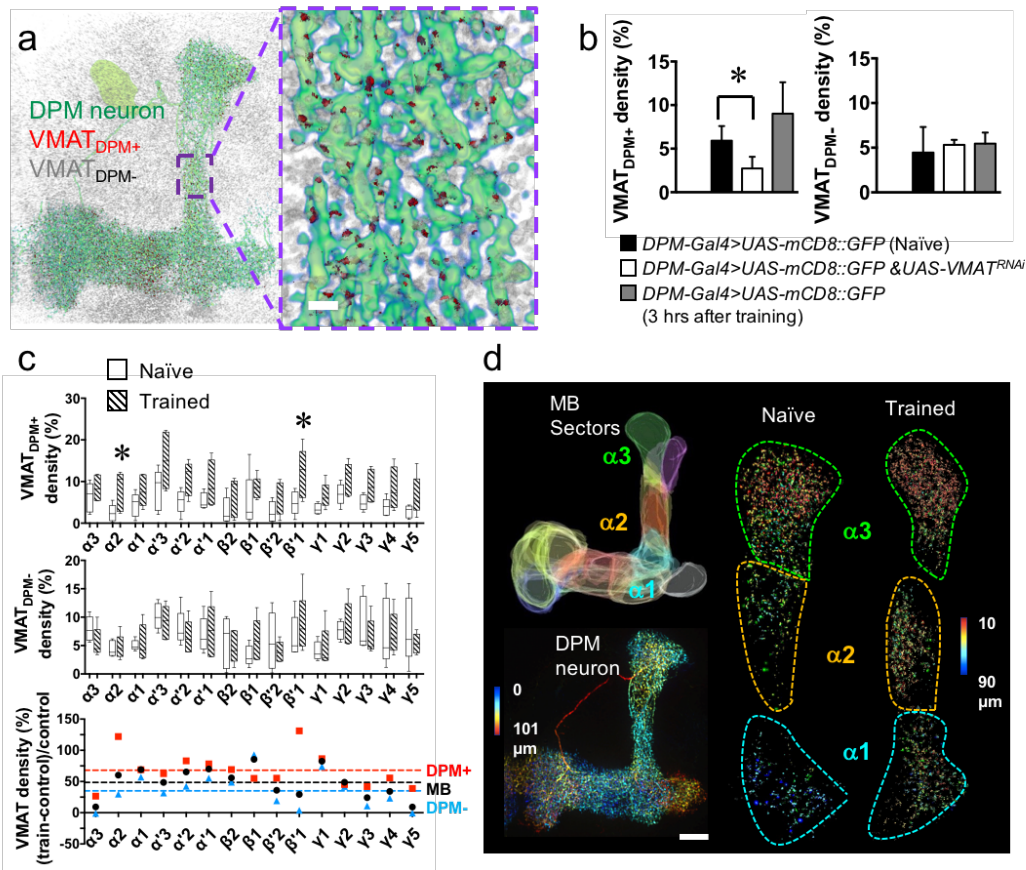

1

2 **Fig. 4. Training induces sector-specific increases in VMAT expression in axons of DPM**  
3 **neurons.** (a) Visualization of VMAT molecules. Left, VMAT proteins (gray) distributed  
4 within (red) or outside of (gray) the DPM neurons (green). Right, an enlarged view. (b)  
5 VMAT<sup>RNAi</sup>-mediated changes in VMAT density in the DPM+ neurites (left) and DPM- regions  
6 (right) within the MB 3 hours after 3x spaced training. (c) Comparison of VMAT distribution  
7 in DPM axons between naïve and trained flies. VMAT density increases >100% in the α2  
8 and β'1 sectors of DPM+ neurites (red) but not DPM- regions (blue) after 3x spaced training.  
9 The dashed line indicates the average change among different sectors [Each value represents  
10 the mean ± S.E.M. (n = 6 in B; n = 5 in C); \* = P < 0.05; see **Supplementary Fig. 8** for  
11 calculations]. (d) Upper left, a schematic representation of MB sectors. Lower left, a single  
12 DPM<sup>RNAi</sup> neuron innervates all MB lobes. Right, a representative volume image shows the



- 1 training-induced increase in the number of VMAT proteins in the DPM neurites innervating
- 2 the  $\alpha 2$  sector. Color code indicates depth.
- 3

## 1 **Methods**

### 2 **Fly stocks**

3 Fly stocks were raised on cornmeal food at a temperature of 25°C and relative humidity of  
4 70% under a 12-h light/dark cycle. The following fly lines were used in the current study:  
5 *Fruitless-Gal4* (66696, Bloomington *Drosophila* Stock Center) was used to label neck  
6 neurons, *MZ19-Gal4* (34497, Bloomington *Drosophila* Stock Center) was used to label  
7 olfactory projection neurons, *12862-Gal4* (111501, DGRC) was used to label giant fiber  
8 neurons, *TH-Gal4* (8848, Bloomington *Drosophila* Stock Center) was used to label  
9 dopaminergic neurons, *c316-Gal4* (30830, Bloomington *Drosophila* Stock Center) and  
10 *VT64246-Gal4* (v204311, VDRC) were used to label DPM neurons, *UAS-mCD8::GFP* (5137  
11 and 5310, Bloomington *Drosophila* Stock Center) and *UAS-GCaMP6f* (42747, Bloomington  
12 *Drosophila* Stock Center) were used as reporters of Gal4 expression, *UAS-Dscam[1.7]::GFP*  
13 (From T. Lee, Howard Hughes Medical Institute, Ashburn, VA) was used to label Dscam in  
14 Gal4-labelled neurons, *tub-Gal80<sup>ts</sup>* (From L. Luo, Stanford University, Stanford, CA) was  
15 used to block Gal4 expression at 18°C, *UAS-Ddc<sup>RNAi</sup>* (3329, VDRC) and *UAS-Trh<sup>RNAi</sup>* (35240,  
16 VDRC) were used to downregulate serotonin expression in DPM neurons, and *UAS-VMAT*  
17 *RNAi* (v104072 and v4856, VDRC) was used to downregulate VMAT protein expression in  
18 DPM neurons.

### 19 **Immunohistochemistry**

20 Fly brains were dissected in PBS (pH 7.2) and immediately transferred to a microwave-safe  
21 24-well plate containing 4% paraformaldehyde in PBS. The plate was placed on a shaker for  
22 25 min. Fixed tissues were then permeabilized and blocked in PBS containing 2% Triton X-  
23 100 and 10% normal goat serum (NGS; Vector Laboratories, Burlingame, CA) at 4°C  
24 overnight. Immunostaining was sequentially performed in PBS containing 1% Triton X-100

1 and 0.25% NGS using the following primary antibodies: mouse anti-Discs large antibodies  
2 (antibody 4F3; 1:20 dilution; Developmental Studies Hybridoma Bank, Iowa City, IA), rabbit  
3 anti-GFP antibodies (1:250 dilution; Thermo Fisher Scientific Inc, A11122), rabbit anti-  
4 VMAT (1:250 dilution), and secondary antibodies including either biotinylated goat anti-  
5 rabbit immunoglobulin G (IgG) (1:250 dilutions; Thermo Fisher Scientific Inc). Biotin-  
6 conjugated IgG was detected using Alexa Fluor streptavidin 635 (1:500 dilution; Thermo  
7 Fisher Scientific Inc) or HMSiR streptavidin (1:1000 dilution). Each step was carried out  
8 over the course of 2 days, with extensive washes between steps at room temperature (25°C).  
9 Samples were then transferred to ScaleView-A2 for 2 days before imaging.

#### 10 **HMSiR conjugates**

11 For goat anti-rabbit labelling of HMSiR, we incubated 250 µg of goat anti-rabbit F(ab')<sub>2</sub>  
12 fragment (Jackson ImmunoResearch, West Grove, PA) in 0.1 M sodium borate buffer at pH  
13 8.5 with 0.8 µl of 10 mM HMSiR-NHS (GORYO Chemical, Bunkyo-ku, Tokyo) in DMSO  
14 at 37°C for 30 min, after which the sample was incubated at 4°C overnight. The conjugated  
15 antibody was then passed through a Desalt Z-25 column (emp Biotech GmbH, Berlin) to  
16 remove unconjugated HMSiR-NHS, and the medium was replaced with PBS (pH 7.2). To  
17 label HMSiR with streptavidin, we incubated 125 µg of streptavidin (Sigma-Aldrich, St.  
18 Louis, MO) in 250 µl PBS at pH 7.2 with 0.8 µl of 10 mM HMSiR-NHS in DMSO, after  
19 which we utilized the same protocol as that used for antibody labelling. Concentrations were  
20 then measured at an absorbance of 280 nm, after which the HMSiR conjugates were stored at  
21 4°C until use.

#### 22 **Microscope optics and image acquisition**

23 The lasers were combined with long-pass dichroic filters and aligned collinearly before  
24 entering an acousto-optical tunable filter (AOTF), which is used to control laser exposure



1 time and wavelength. The laser beam passing through the AOTF was expanded to 4 mm full  
2 width at half maximum (FWHM) to distribute the energy evenly onto the annular ring pattern  
3 at the quartz mask for creating the illumination pattern conjugated to the back focal plane of  
4 the objective lens. To conjugate the illumination pattern to the scanning mirrors, a pair of  
5 lenses aligned in 4F geometry was inserted between the mask and scanning mirrors (L12,  
6 L13, **Fig. 1a**). Another 4F lens pair was inserted between the galvo mirrors to relay the  
7 pattern (L14, L15, **Fig. 1a**). After reaching the scanning mirror (Cambridge Technology,  
8 6215H), the pattern was magnified and conjugated to the back aperture of the excitation  
9 objective through another pair of lenses (L16, L17, **Fig. 1a**). A dip-in objective was placed  
10 perpendicular to the illumination plane to collect the fluorescence signal. Using a piezo  
11 scanner (Physik Instrumente, P-725.4 PIFOC), the detection objective was moved in  
12 synchrony with the position of the lightsheet, which was controlled by the scanning mirror.  
13 Between the individual volumetric scans, an additional settle time on the order of  
14 milliseconds was included to stabilize the piezo scanner.

15 The length of the self-reconstructing axial extent of the Gaussian-Bessel lightsheet can  
16 be controlled by the geometry of the illumination pattern<sup>16</sup>. A ring-shaped illumination will  
17 transform into a concentric irradiance profile distributed along the radial direction around the  
18 optical axis at the focal plane of the excitation objective lens. The illumination profile and the  
19 total power carried by the Bessel beam are controlled by the diameter and thickness of the  
20 annular ring. In the present study, the geometry of the illumination pattern was chosen based  
21 on a balance between the area of coverage and the power density of the lightsheet. To achieve  
22 stochastic blinking with reasonable signal to noise ratio (SNR), it is necessary to fill the  
23 observation plane with a power density above  $40\text{W}/\text{cm}^2$ . To localize subareas within the fruit  
24 fly brain, we used a lightsheet with an axial FWHM of  $50\ \mu\text{m}$  (outer N.A. = 0.26, inner N.A.  
25 = 0.185).

1 As the size of the observation area increases, however, the power density of the lightsheet  
2 created by simply filtering the laser profile using an annular ring mask is insufficient for  
3 providing high precision localization because of the decreasing SNR, as the annular ring  
4 intrinsically filters out the most intense component from the Gaussian irradiance profile (**Fig.**  
5 **1d2, e1**). In this optical configuration, the field-of-view (FOV) cannot be extended further.  
6 We therefore used an axicon lens (Thorlabs) to concentrate the laser energy into a ring  
7 pattern, following which the unwanted components were filtered using an annular ring mask  
8 (outer N.A. = 0.187, inner N.A. = 0.174). The length of the lightsheet generated by the axicon  
9 lens can extend to over 200  $\mu\text{m}$  to cover the entire cross section of the fruit fly brain while  
10 maintaining a sufficient power density to excite HMSiR (**Supplementary Fig. S1d3, e2**).

11 Choice of the objective lens pair depends on the type of immersion medium. In PBS, a  
12 customized excitation objective (Special Optics, 0.65 NA, 3.74 mm WD) was used for image  
13 acquisition, while a water immersion detection objective lens (Nikon, CFI Apo LWD 25XW,  
14 1.1 NA, 2 mm WD) was used for signal collection. For image acquisition in ScaleView-A2,  
15 the excitation objective lens was replaced by a customized objective lens (N.A. = 0.5,  
16 working distance = 12.8 mm; NARLabs, ITRC, Taiwan, **Fig. 1b**) designed to optimize  
17 performance in media with a higher refractive index ( $n = 1.38$ ). An immersion detection  
18 objective (Olympus, XLPLN25XSVMP2, 25X, 1.0 NA) was used for single-molecule  
19 detection in the high-refractive index medium. In the present study, the lightsheet system  
20 was carefully calibrated to facilitate single-molecule detection with respect to each of the  
21 experimental conditions. As shown in Extended Data Fig. 1, the point spread function (PSF)  
22 values from different system configurations were compared to quantify the image quality of  
23 the lightsheet microscope system.

24 Single molecule fluorescence was detected using a sCMOS camera (Hamamatsu, Orca  
25 Flash 4.0 v2 sCOMS) equipped with a tube lens ( $f = 500$  mm). The exposure time of each

1 frame is typically 100 ms, while the period of an individual volume stack is approximately 40  
2 s (400 layers in one stack).

3 Samples were loaded onto 5-mm round glass coverslips (Warner Instruments) using 100  
4 nl of Cell-Tak™ (Corning®). During image acquisition, samples and both objectives were  
5 immersed in a chamber to maintain optical clarity. All experiments were conducted at room  
6 temperature.

7 The use of a Bessel beam lightsheet allows for single-molecule localization even when  
8 tissues are maintained in PBS, although the uncertainty of molecule localization increases  
9 along with the depth of the illumination plane (**Supplementary Fig. 3a, Supplementary**  
10 **Movie 1**). This increases the full-width at half-maximum intensity and reduces image quality  
11 in the brain, compared to images acquired from the relatively thinner neck (**Supplementary**  
12 **Fig. 3b**). To achieve single-molecule localization in deep tissues, we integrated the lightsheet  
13 with optical tissue clearing technology<sup>45,46</sup>. When the fly brain is cleared with neutral  
14 ScaleView-A2 solution<sup>18</sup>, the Bessel lightsheet provides enough energy to excite a dense  
15 population of HMSiR fluorophores at high efficiency throughout the entire brain. As  
16 expected, blinking signals are much clearer in ScaleView-A2 than in PBS, especially beyond  
17 a depth of 30  $\mu\text{m}$  (**Supplementary Fig. 4**). Moreover, the localization uncertainties remain  
18 invariant as the imaging depth increases (**Fig. 1d**). This single-molecule DLM imaging  
19 method allows for the three-dimensional reconstruction of olfactory projection neurons,  
20 whose axons extend from the antennal lobe at the frontal surface of the brain to the calyx at  
21 the posterior surface (**Supplementary Fig. 5a**). With over 50 million molecules localised at a  
22 lateral precision of approximately 30 nm, the quality of these DLM images represents a  
23 substantial improvement over conventional lightsheet images acquired using the same optical  
24 parameters (**Supplementary Movie 2**).

25 **Image processing and rendering**

1 Localization images were reconstructed using ThunderSTORM<sup>19</sup>, an ImageJ plugin with a  
2 self-built macro for batch processing of massive data. As schematically depicted in  
3 **Supplementary Fig. 2**, data were initially transposed to time lapse series on a local  
4 workstation, after which they were transferred to remote Lustre storage and distributed to a  
5 three-node Torque cluster (Intel Xeon X5660 with 48 GB memory each, connected to Lustre  
6 storage). After a particle list was generated for each layer, the list was deposited into one of  
7 the clusters, after which a single list containing all localization events within the imaging  
8 volume was generated. The list was then used to render the reconstruction image for  
9 presentation and analysis. ThunderSTORM was used to perform drift correction using  
10 fiducial marker tracking or the cross-correlation method. For three-dimensional volume  
11 rendering, the image stack was resampled to minimize discontinuities in structural integrity.

12 We used the Material Statistics module in Avizo 9.4 (Thermo Fisher Scientific Inc) to  
13 quantify the volume of MB sectors, DPM neurons and VMAT protein expression. This  
14 module calculates the voxel numbers inside a labeled area, which can be transformed into  
15 volumes by multiplying by a known voxel size in each image. We manually segmented the  
16 boundaries of MB sectors using the Lasso tool in segmentation mode. We used the Magic  
17 Wand tool to select one seed within the DPM neuron and to determine a reasonable threshold  
18 for selecting connecting voxels. We directly used the threshold tool for whole-volume  
19 VMAT images, setting the lower bound to 78 (8-bit; 0-255).

## 20 **Analysis of image acquisition speed and resolution**

21 Resolution in localization microscopy is governed by localization precision and the density of  
22 localization events. When resolving novel structures, an extremely high localization density  
23 is required<sup>13</sup>. Very long image acquisition times are required for this outcome, however,  
24 which slows experimental throughput. To determine a realistic acquisition time with a  
25 reliable statistical basis, we plotted resolution with respect to time. For localization of VMAT

1 expression in DPM neurons, localization density (number of localization events/area of the  
2 structure) increases exponentially with acquisition time. As the number of sampling frames  
3 increases, the growth of localization density slows due to photo-bleaching and depletion of  
4 dye molecules (**Supplementary Fig. 9a**). The theoretical resolution limit is estimated by the  
5 localization precision and the Nyquist resolution<sup>47,48</sup>. Resolution power increases rapidly in  
6 the first 300 frames (**Supplementary Fig. 9b**). Afterwards, resolution power slows and  
7 finally converges at 86 nm. This represents a lower bound of structural resolution that can be  
8 achieved with our current methods.

9 More generally, if an infinite photon budget existed and no photo-bleaching occurred,  
10 localization density would increase monotonically with the number of sampling frames. Such  
11 modeling indicates that resolution reaches 25 nm when 10,000 frames per layer are used in  
12 reconstruction—which is 20 times the acquisition time used in this study. Our observed  
13 dependence of resolution on sampling frames reveals an exponential relation (likely due to  
14 photo-bleaching and limited photon budget; **Supplementary Fig. S9c**), which suggests that  
15 the acquisition time required for maximal resolution may be much longer.

16 Fourier ring correlation (FRC) provides a quantitative determination of the structural  
17 characteristic in the reconstructed image<sup>49</sup>. The FRC value at the 1/7 cutoff frequency in  
18 VMAT protein localization is  $283.6 \pm 69.9$  nm (**Supplementary Fig. 9d**). It should be noted  
19 that FRC analysis is based on weighting of the spatial frequency domain and is dominated by  
20 the primary feature within the image. As shown in the inset of (**Supplementary Fig. 9d**),  
21 VMAT protein presents an island feature with a dimension from hundreds of nanometers to  
22 micrometer, which leads to a higher estimated FRC value.

23 When considering the statistics of localizing VMAT molecules, the distribution of VMAT is  
24 confined to DPM axons. Consequently, the reliability of the results is dominated by  
25 localization precision rather than structural determinations. Regardless, we kept the number

1 of frames of time-lapse data used in VMAT localization to 400 to 500 per layer to ensure all  
2 analyses were performed based on similar localization density and theoretical resolution.  
3 Acquisition time for one VMAT dataset was approximately 5.6 hours (100 ms per frame, 401  
4 frames per imaging volume, 500 volumes recorded). For localization of anti-TH signals (**Fig.**  
5 **2**), acquisition time was approximately 5.8 hours (80 ms per frame, 521 frames per imaging  
6 volume, 500 volumes recorded). With four sub-volumes per whole brain, total acquisition  
7 time took approximately 23.2 hours to complete.

### 8 ***Drosophila* memory assay**

9 Flies were subjected to aversive olfactory conditioning 2 to 5 days after eclosion. Prior to  
10 conditioning, flies were accommodated to a behavioral room with a temperature of 20°C and  
11 relative humidity of 70% for 30 min. At the start of olfactory conditioning, approximately 80  
12 flies were transferred to the training tube, after which two aversive odors (3-octanol (OCT);  
13 dilution:  $1.5 \times 10^{-3}$ ; Sigma-Aldrich) and 4-methylcyclohexanol (MCH); dilution:  $1.0 \times 10^{-3}$ ;  
14 Fluka) were delivered successively in a current of air (750 ml/min) for 60 s at intervals of 45  
15 s. The first odor (CS+) was paired with 12 pulses of electric foot shock at 65 V (serving as  
16 the unconditioned stimulus [US]), while the second odor (CS-) was not. This process  
17 represented a single session of training. In our experiment, we conducted three sessions of  
18 spaced training, with a 10-min interval between each cycle.

19 *Gal4* expression was inhibited by *Gal80<sup>ts</sup>* by maintaining flies at 18°C. One day before  
20 training, flies were moved from 18°C to 30°C, thereby deactivating *Gal80<sup>ts</sup>*. Control flies  
21 were maintained at a constant temperature of 18°C. Wild-type and experimental flies carrying  
22 the same transgenes were trained using several different protocols: three spaced sessions (3x  
23 spaced), three massed sessions (3x massed), or 10 spaced sessions (10x spaced).

### 24 **Statistical analysis**

1 For behavioral experiments, control and treatment groups were tested together (balanced and  
2 blinded), with sample sizes listed in figure legends. Because performance indices were  
3 normally distributed, the significance of each treatment-versus-control paired comparison  
4 was tested using a two-tailed Student's t-test, with P values indicated in figures.

5

6 **Reference:**

- 7 45 Richardson, D. S. & Lichtman, J. W. Clarifying tissue clearing. *Cell* **162**, 246-257 (2015).  
8 46 Chiang, A. S. *et al.* Three-dimensional mapping of brain neuropils in the cockroach,  
9 *Diploptera punctata*. *J Comp Neurol* **440**, 1-11 (2001).  
10 47 Shroff, H., Galbraith, C. G., Galbraith, J. A. & Betzig, E. Live-cell photoactivated  
11 localization microscopy of nanoscale adhesion dynamics. *Nat Methods* **5**, 417-423 (2008)  
12 48 Shim, S. H. *et al.* Super-resolution fluorescence imaging of organelles in live cells with  
13 photoswitchable membrane probes. *Proc Natl Acad Sci U S A* **109**, 13978-13983 (2012).  
14 49 Nieuwenhuizen, R. P. *et al.* Measuring image resolution in optical nanoscopy. *Nat*  
15 *Methods* **10**, 557-562 (2013).
